# Supplementary material
Source: publisher figshare collection journal article supplement (https://gsajournals.figshare.com/articles/dataset/_/6856781)
Supplement: Supplementary file 1 [file 3]

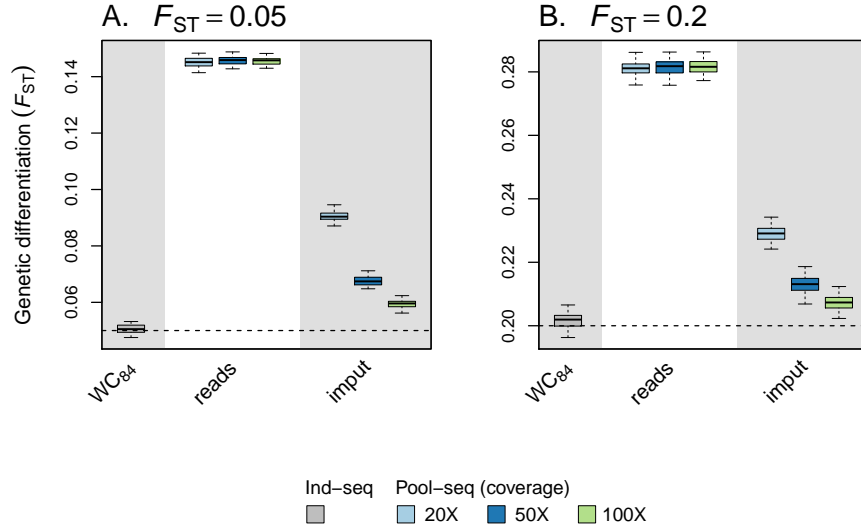

**Figure S3** Precision and accuracy of naive estimators of  $F_{ST}$  for Pool-seq data. We compare  $WC_{84}$  estimates computed from allele count data inferred from individual genotypes (Ind-seq) to  $WC_{84}$  estimates computed: (i) directly from read counts, as if they were allele counts (“reads”); (ii) from allele counts imputed by maximum-likelihood (“imput”). Each boxplot represents the distribution of multilocus  $F_{ST}$  estimates across all demes in an 8-island model, and over 50 independent replicates of the **ms** simulations. We used two migration rates, corresponding to  $F_{ST} = 0.05$  (A) and  $F_{ST} = 0.20$  (B). The size of each pool was fixed to 10. For Pool-seq data, we show the results for different coverages (20X, 50X and 100X). In each graph, the dashed line indicates the simulated value of  $F_{ST}$ .
