# Supplementary material
Source: publisher figshare collection journal article supplement (https://gsajournals.figshare.com/articles/dataset/_/6856781)
Supplement: Supplementary file 2 [file 3]

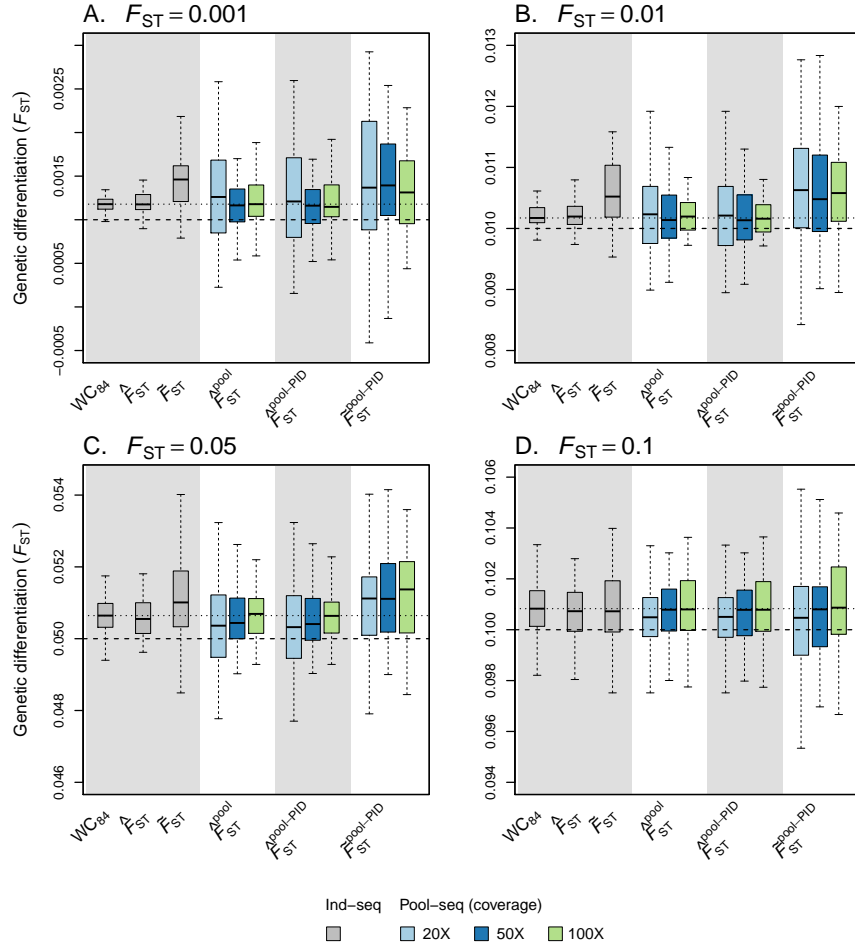

**Figure S4** Precision and accuracy of alternative estimators of  $F_{ST}$  with varying pool size, for various levels of differentiation (A–D). The haploid pool size  $n$  drawn independently for each deme from a Gaussian distribution with mean 100 and standard deviation 30;  $n$  was rounded up to the nearest integer, with min. 20 and max. 300 haploids per deme. We considered three estimators based on allele count data inferred from individual genotypes (Ind-seq):  $WC_{84}$ ,  $\hat{F}_{ST} \equiv (\hat{Q}_1 - \hat{Q}_2) / (1 - \hat{Q}_2)$  (where  $\hat{Q}_1$  and  $\hat{Q}_2$  are the weighted frequencies of identical pairs of genes within and between subpopulations, respectively, with weights equal to the number of pairs of genes) and  $\tilde{F}_{ST} \equiv (\tilde{Q}_1 - \tilde{Q}_2) / (1 - \tilde{Q}_2)$  (where  $\tilde{Q}_1$  and  $\tilde{Q}_2$  are the unweighted frequencies of identical pairs of genes within and between subpopulations, respectively). For Pool-seq data, we considered the estimators  $\hat{F}_{ST}^{pool}$  (Equation 12),  $\hat{F}_{ST}^{pool-PID}$  (Equation A44) and  $\tilde{F}_{ST}^{pool-PID}$  (Equation A45). Each boxplot represents the distribution of multilocus  $F_{ST}$  over 50 independent replicates of the *ms* simulations. For Pool-seq data, we show the results for different coverages (20X, 50X and 100X). In each graph, the dashed line indicates the simulated value of  $F_{ST}$  and the dotted line indicates the median of the distribution of  $WC_{84}$  estimates.
