# Supplementary material
Source: publisher figshare collection journal article supplement (https://gsajournals.figshare.com/articles/dataset/_/6856781)
Supplement: Supplementary file 4 [file 3]

**Table S3** Effect of variable coverage on pairwise  $F_{ST}$  estimates

| $F_{ST}$ | $n$ | Pool-seq |                       | Ind-seq          |
|----------|-----|----------|-----------------------|------------------|
|          |     | $\Delta$ | $\hat{F}_{ST}^{pool}$ | WC <sub>84</sub> |
| 0.05     | 10  | 20       | 0.050 (0.006)         |                  |
| 0.05     | 10  | 50       | 0.050 (0.004)         | 0.050 (0.004)    |
| 0.05     | 10  | 100      | 0.050 (0.004)         |                  |
| 0.05     | 100 | 20       | 0.051 (0.003)         |                  |
| 0.05     | 100 | 50       | 0.051 (0.002)         | 0.051 (0.002)    |
| 0.05     | 100 | 100      | 0.051 (0.002)         |                  |
| 0.20     | 10  | 20       | 0.200 (0.007)         |                  |
| 0.20     | 10  | 50       | 0.200 (0.007)         | 0.200 (0.007)    |
| 0.20     | 10  | 100      | 0.200 (0.007)         |                  |
| 0.20     | 100 | 20       | 0.202 (0.006)         |                  |
| 0.20     | 100 | 50       | 0.203 (0.006)         | 0.203 (0.005)    |
| 0.20     | 100 | 100      | 0.203 (0.005)         |                  |

Pairwise multilocus  $\hat{F}_{ST}^{pool}$  estimates were computed for various conditions of expected  $F_{ST}$  and pool size ( $n$ ) in an island model with  $n_d = 8$  subpopulations (pools). The coverage ( $\delta_i$ ) was varying across demes and loci, with  $\delta_i \sim \text{Pois}(\Delta)$ . The mean (RMSE) is computed for a single pair of subpopulations, over 50 independent simulated datasets, each made of 5,000 loci. For comparison, we computed multilocus WC<sub>84</sub> estimates from allele count data inferred from individual genotypes (Ind-seq).
