# Supplementary material
Source: publisher figshare collection journal article supplement (https://gsajournals.figshare.com/articles/dataset/_/6856781)
Supplement: Supplementary file 6 [file 3]

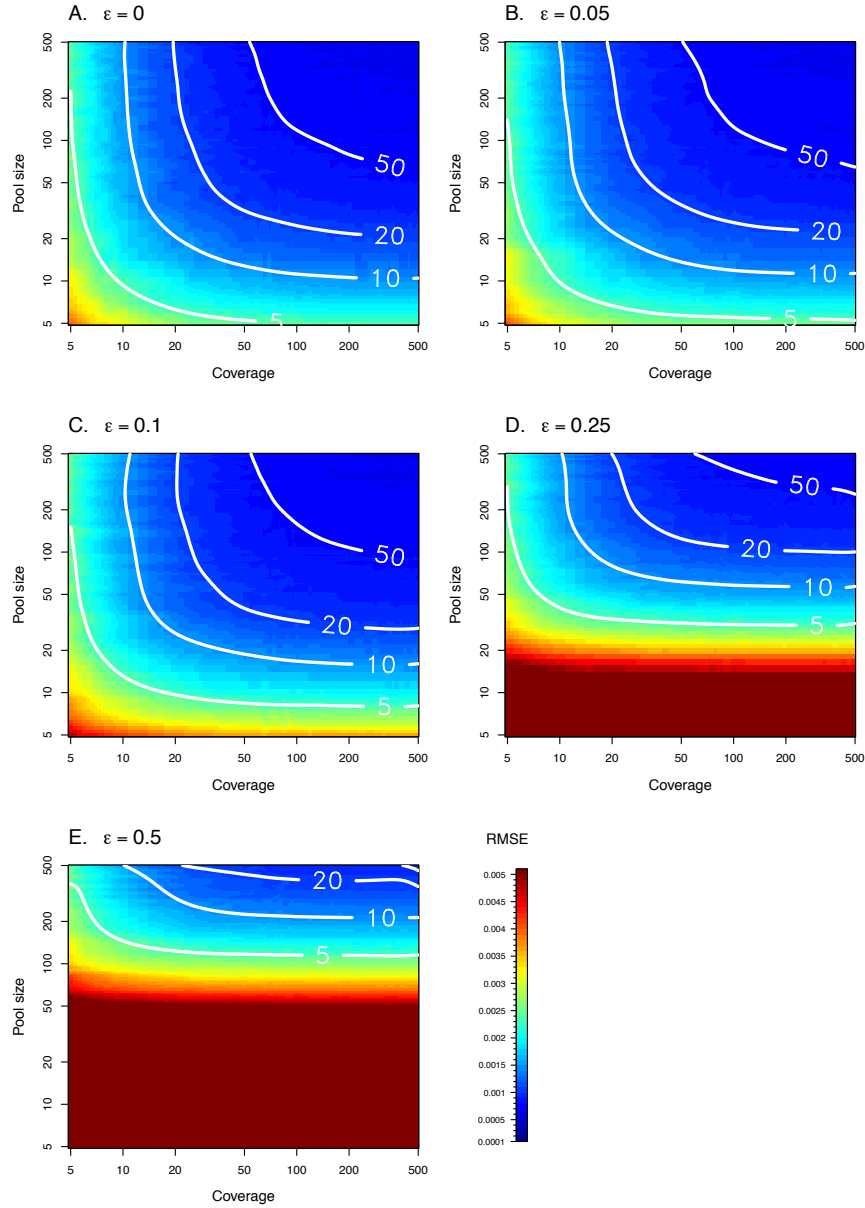

**Figure S2** Precision and accuracy of our estimator  $\hat{F}_{ST}^{\text{pool}}$  as a function of pool size and coverage, with experimental error rate  $\epsilon$  varying from 0 to 0.5 (A–E). Each density plot, which represents the root mean squared error (RMSE) of the estimator  $\hat{F}_{ST}^{\text{pool}}$ , was obtained using simple linear interpolation from a set of  $44 \times 44$  pairs of pool size and coverage values. For each pool size and coverage, 500 replicates of 5,000 markers were simulated from an island model with  $n_d = 8$  demes. Plain white isolines represent the RMSE of the  $WC_{84}$  estimator computed from Ind-seq data, for various sample sizes ( $n = 5, 10, 20$ , and  $50$ ). Each isoline was fitted using a thin plate spline regression with smoothing parameter  $\lambda = 0.005$ , implemented in the `fields` package for R.
