# Supplementary material
Source: publisher figshare collection journal article supplement (https://gsajournals.figshare.com/articles/dataset/_/6856781)
Supplement: Supplementary file 7 [file 3]

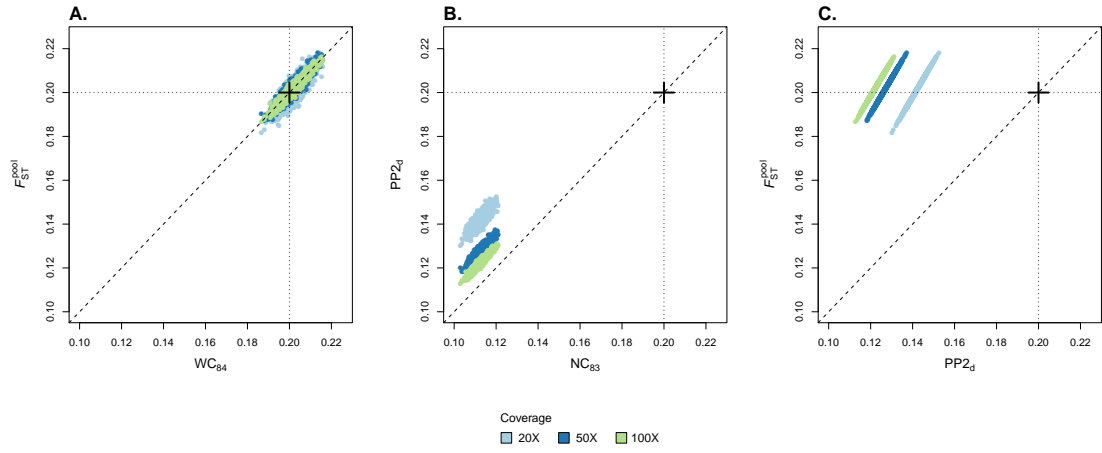

**Figure S1** Pairwise estimators of  $F_{ST}$ . A. Multilocus estimates  $\hat{F}_{ST}^{pool}$  computed from read counts, as a function of  $WC_{84}$  estimates computed from individual genotypes. B. Multilocus estimates  $PP2_d$  computed from read counts, as a function of  $NC_{83}$  estimates computed from individual genotypes. C. Multilocus estimates  $\hat{F}_{ST}^{pool}$  as a function of multilocus  $PP2_d$  estimates. In each graph, the dots represent multilocus estimates of  $F_{ST}$  across all pairs of subpopulations from an 8-island model, and over 50 replicate `ms` simulations. We specified the migration rate corresponding to  $F_{ST} = 0.20$ . The size of each pool was fixed to 100. The results are shown for different coverages (20X, 50X and 100X). The cross indicates the simulated value of the parameter  $F_{ST}$ .
