# Supplementary material
Source: publisher figshare collection journal article supplement (https://gsajournals.figshare.com/articles/dataset/_/6856781)
Supplement: Supplementary file 8 [file 3]

**Table S2** Effect of unequal sampling on pairwise  $F_{ST}$  estimates

| $F_{ST}$ | $n$                    | Pool-seq |                       | Ind-seq          |
|----------|------------------------|----------|-----------------------|------------------|
|          |                        | Cov.     | $\hat{F}_{ST}^{pool}$ | WC <sub>84</sub> |
| 0.05     | $\mathcal{N}(100, 30)$ | 20×      | 0.051 (0.003)         |                  |
| 0.05     | $\mathcal{N}(100, 30)$ | 50×      | 0.052 (0.003)         | 0.051 (0.002)    |
| 0.05     | $\mathcal{N}(100, 30)$ | 100×     | 0.051 (0.002)         |                  |
| 0.20     | $\mathcal{N}(100, 30)$ | 20×      | 0.202 (0.007)         |                  |
| 0.20     | $\mathcal{N}(100, 30)$ | 50×      | 0.202 (0.006)         | 0.202 (0.006)    |
| 0.20     | $\mathcal{N}(100, 30)$ | 100×     | 0.202 (0.006)         |                  |

Pairwise multilocus  $\hat{F}_{ST}^{pool}$  estimates were computed for various conditions of expected  $F_{ST}$  and coverage (Cov.) in an island model with  $n_d = 8$  subpopulations (pools). The pool size ( $n$ ) was variable across demes, with haploid sample size  $n$  drawn independently for each deme from a Gaussian distribution with mean 100 and standard deviation 30;  $n$  was rounded up to the nearest integer, with min. 20 and max. 300 haploids per deme. The mean (RMSE) is computed for a single pair of subpopulations, over 50 independent simulated datasets, each made of 5,000 loci. For comparison, we computed multilocus WC<sub>84</sub> (Weir and Cockerham 1984) estimates from allele count data inferred from individual genotypes (Ind-seq).
